# Supplementary material for: Preparation of colloidal solution of silica encapsulating cyanobiphenyl unit-capped ZnO QD emitting in the blue region
Source: Royal Society of Chemistry journal article supplement (doi:10.1039/c5dt03851k), 2015-12-01
Supplement: c5dt03851k1.pdf [file c5dt03851k1.pdf]

# **Preparation of colloidal solution of silica encapsulating cyanobiphenyl units-capped ZnO QD emitting in the blue region**

C. Neaime, M. Amela-Cortes, F. Grasset, M. Zakhour, Y. Molard

[maria.amela-cortes@univ-rennes1.fr](mailto:maria.amela-cortes@univ-rennes1.fr); [chrystelle.neaime@insa-rennes.fr](mailto:chrystelle.neaime@insa-rennes.fr)

## **Experimental details**

### **1. Raw Materials**

Zinc acetate dehydrate ( $\text{Zn}(\text{Ac})_2 \cdot \text{H}_2\text{O}$ , 99,5%, Fluka), Tetramethylammonium-hydroxide (TMAOH, 25 % in methanol, Alfa Aesar), Dimethyl sulfoxide, Ethanol (Absolute, Sigma-Aldrich), Tetraethyl orthosilicate (TEOS, 99%, Merck) were used without further purification. Carboxylic acids HL<sup>3,5</sup> and HL<sup>3,4,5</sup> were synthesized by using reported procedures and the analytic data showed conformity with previous results.<sup>1,2</sup>

### **2. Preparation of ZnO-Cya@SiO<sub>2</sub> core-shell nanocolloids**

ZnO QD were prepared using similar route as published by Rakshit *et al.*<sup>3</sup> which used DMSO instead of alcohol as our previous work.<sup>4</sup> In more detail, for the synthesis of the ZnO QD, 0.1 M of  $\text{Zn}(\text{Ac})_2 \cdot \text{H}_2\text{O}$  was dissolved in 30 mL of DMSO at room temperature then 1.26 mL of TMAOH was added, followed by stirring for two days. On the other hand, 41 mg of HL<sup>3,5</sup> were dissolved in 1 mL of DMSO and the solution was heated to 130 °C and then dropped very slowly on 3 mL of the ZnO colloidal solution followed by adding 2 mL of absolute ethanol. After an hour of continuous stirring, 30 μL of TMAOH and 200 μL of TEOS were added and the mixture stirred further for 2 days at room temperature. The solution was perfectly clear and remains like this several days. The precipitation of the nanoparticles of ZnO-Cya@SiO<sub>2</sub> is realized by adding ethanol and then centrifugation before redispersion in aqueous media.

### **3. Characterization**

The X-ray diffraction patterns of the obtained nanocrystalline powders were recorded on a Bruker D8 X-ray diffractometer using Cu Kα1. The TEM images were recorded on a JEOL

JEM-1400 to 120 KV equipped by a camera CCD Gatan Orius SC 1000. The PL spectra and UV-Vis absorption data were recorded on a Horiba Jobin Yvon, Fluorolog-3 (FL3-22) fluorescence spectrophotometer and a Perkin Elmer Lambda 35 UV-Vis spectrophotometer respectively.

a)

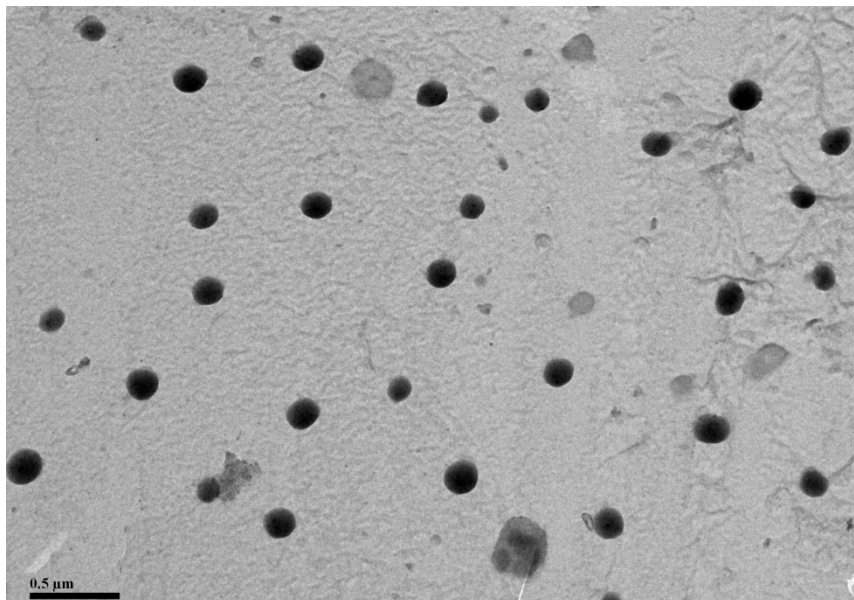

b)

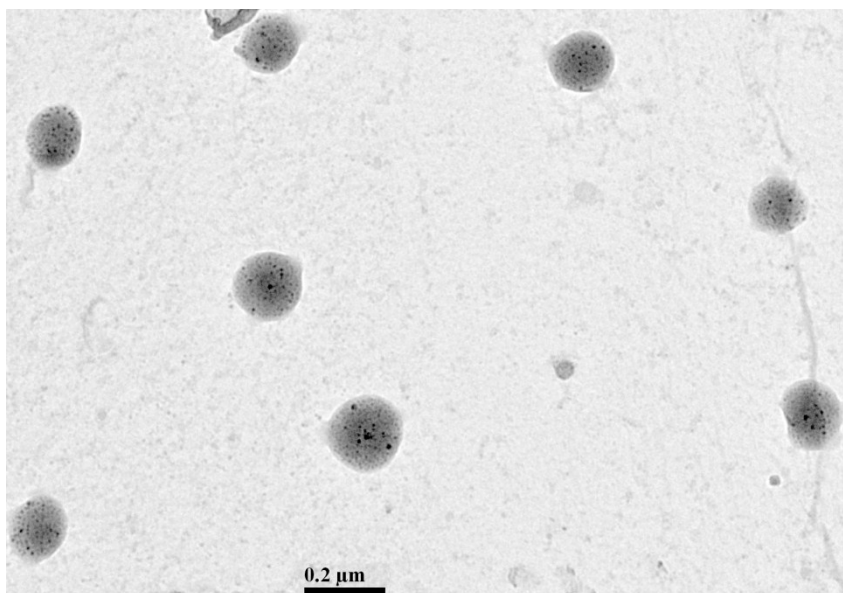

**Figure S1.** TEM images of ZnO-Cya@SiO<sub>2</sub>

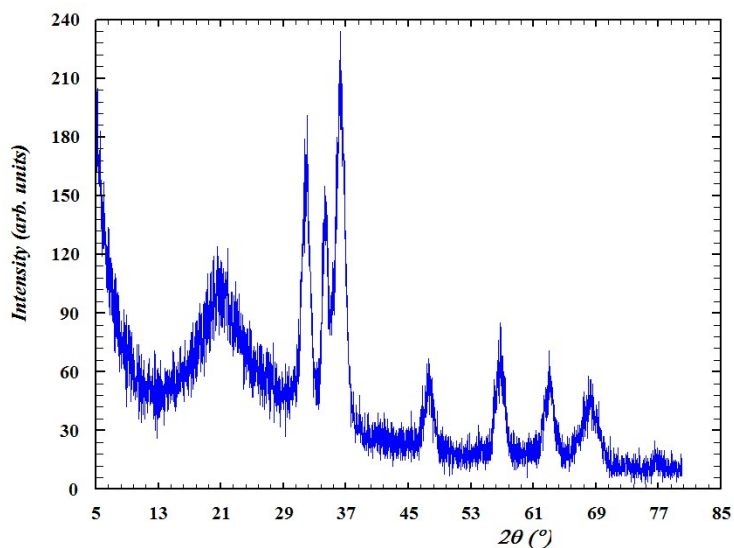

**Figure S2.** Powder XRD patterns for ZnO-Cya@SiO<sub>2</sub>

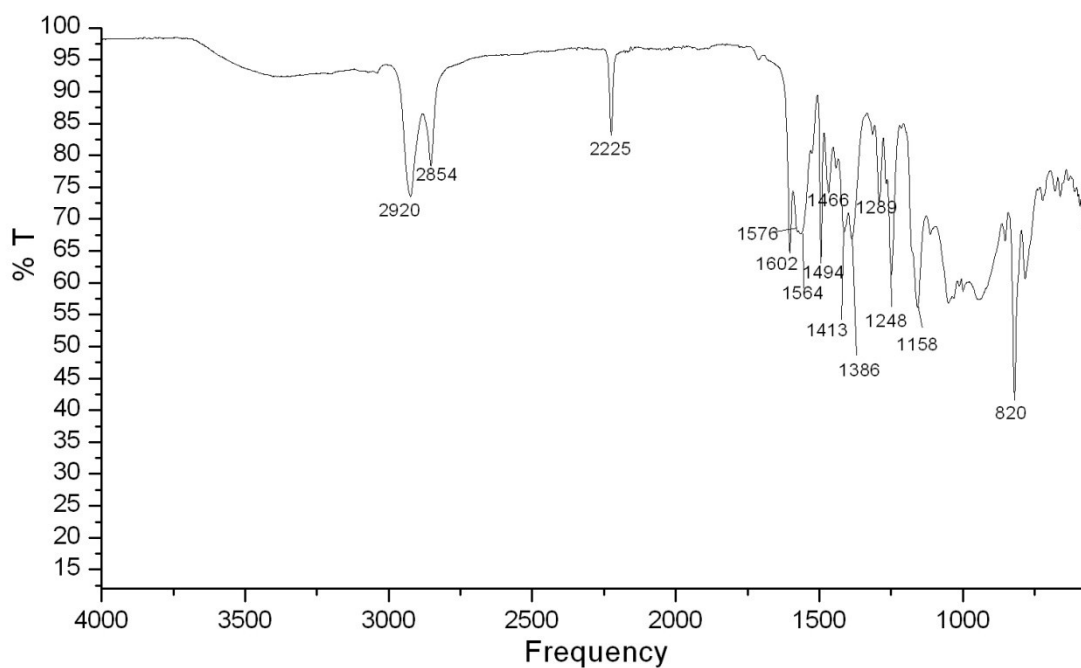

**Figure S3.** FTIR spectrum of ZnO-Cya@SiO<sub>2</sub>

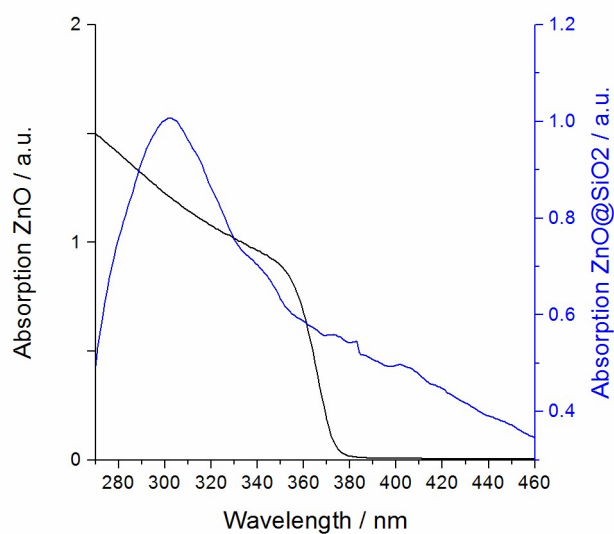

**Figure S4.** UV-Vis spectra of ZnO in and ZnO-Cya@SiO<sub>2</sub> in DMSO

1. M. Amela-Cortes, F. Dorson, M. Prévôt, A. Ghoufi, B. Fontaine, F. Goujon, R. Gautier, V. Cîrcu, C. Mériadec, F. Artzner, H. Folliot, S. Cordier and Y. Molard, *Chemistry – A European Journal*, 2014, **20**, 8561-8565.
2. S. Suarez, O. Mamula, R. Scopelliti, B. Donnio, D. Guillon, E. Terazzi, C. Piguet and J.-C. G. Bunzli, *New Journal of Chemistry*, 2005, **29**, 1323-1334.
3. S. Rakshit and S. Vasudevan, *The Journal of Physical Chemistry C*, 2008, **112**, 4531-4537.
4. C. Neaime, M. Prévôt, M. Amela-Cortes, V. Cîrcu, F. Grasset, H. Folliot and Y. Molard, *Chemistry – A European Journal*, 2014, **20**, 13770-13776.
